# Supplementary material for: The mechanics of drug dissolution: a demonstration of the potential of mathematical and numerical methods for solving flow related problems in pharmaceutics
Source: PLOS journal article supplement (doi:10.1371/journal.pcbi.1007737), 2008-11-01

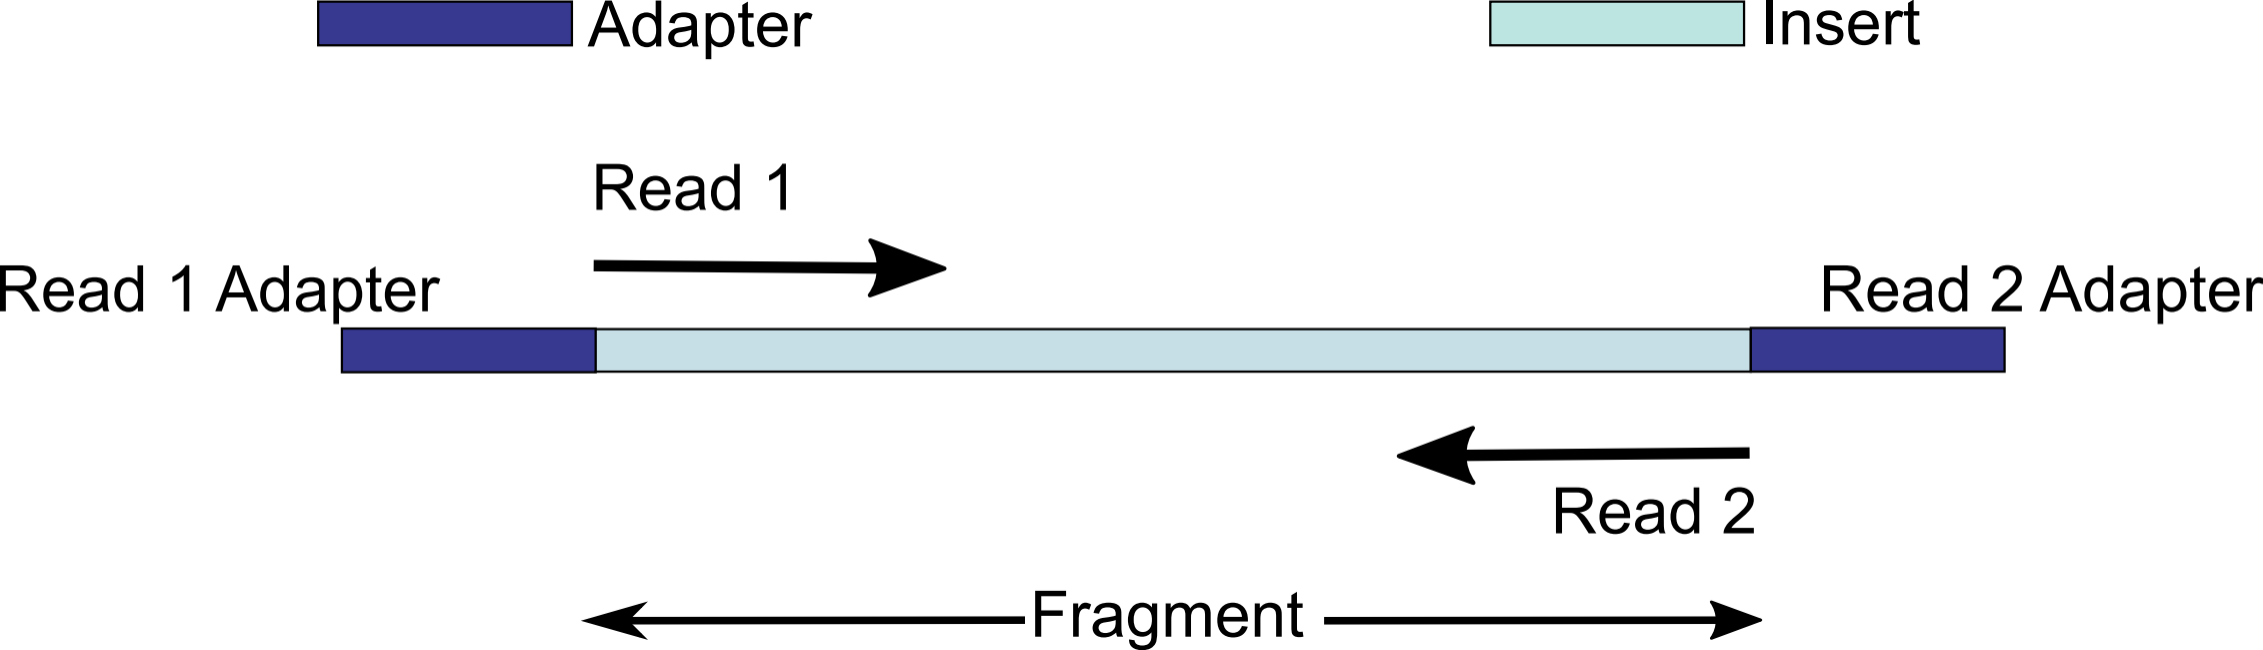

Supplement: S2 (10.1371/journal.pcbi.1007737.s002) [file journal.pcbi.1007737.s002]
